# Supplementary material
Source: publisher figshare collection journal article supplement (https://sage.figshare.com/ndownloader/files/16924361)
Supplement: Supplementary file 1 [file 16924361]

*Actores sindicales y problemáticas socio-ambientales:*

*El caso de la Confederación Sindical de las Américas*

Cecilia Anigstein y Gabriela Wyczykier

1. *Introducción[[1]](#endnote-2)*

En años recientes, el sindicalismo latinoamericano articuló nuevas demandas vinculadas con las luchas medioambientales. En un escenario regional marcado por las críticas al neoliberalismo y por la orientación progresista y nacional popular adoptada por distintos gobiernos en América Latina[[2]](#endnote-3), un diagnóstico crítico fue adquiriendo cierto consenso entre distintos sectores sociales y políticos: la crisis climática, junto al uso intensivo y depredatorio de recursos naturales afecta significativamente las condiciones socio-ambientales, la reproducción de la vida y, en fin, de la fuerza de trabajo. De acuerdo con esta crítica, la naturaleza es apropiada bajo el capitalismo para garantizar la reproducción material, social y cultural de las clases y los grupos sociales. Pero al mismo tiempo, el carácter ilimitado, desigual y asimétrico de estos procesos ha generado como contrapartida efectos devastadores sobre el medio ambiente y sus poblaciones en diverso grado y magnitud a nivel global.

Si bien los sindicatos han sido reticentes a incorporar la problemática socio-ambiental en sus pliegos reivindicativos, algunas experiencias muestran que los trabajadores comenzaron a dotarse de una posición política diferente en las últimas décadas. Y a pesar que aún se observe como un fenómeno poco frecuente, es posible constatar un giro socio-ambiental en la acción gremial, principalmente en las organizaciones de representación internacional y regional.

En estas páginas abordaremos a la Confederación Sindical de las Américas (en adelante CSA), regional de la Confederación Sindical Internacional (en adelante CSI), por las siguientes observaciones realizadas sobre el caso: 1) La CSI, y la CSA, promovieron desde mediados de la década pasada una “transición justa” (concepto que problematizaremos a lo largo de este artículo) para resituar a los trabajadores en un plano de relevancia en las negociaciones multilaterales que definen estrategias para hacer frente a la crisis del clima y concretar procesos de transición energética; 2) la CSA, no solo acompañó esta posición sino que además la fue nutriendo con problemáticas propias de las sociedades de América Latina, dotando a la “transición justa” con una perspectiva del Sur global, sedimentada -a su vez- por un giro eco territorial de las luchas sociales en el continente, dando lugar a una latinoamericanización de la transición justa.

Advertimos que este proceso en el que confluyeron demandas ambientales de la CSI y la CSA, se encuentra estrechamente ligado con el arco de alianzas construido por la organización sindical regional. Particularmente, por su participación y protagonismo en un una dinámica de articulación continental propulsado en conjunto con movimientos sociales que acumulan una tradición de involucramiento en los acciones, movimientos y protestas antiglobalización, con un fuerte despliegue territorial en sus organizaciones de base. Fundamentalmente, nos referimos a CLOC-Vía Campesina, REDES Amigos de la Tierra, Marcha Mundial de Mujeres, Jubileo Sur, entre otras.

En consecuencia, observamos una redefinición de la cuestión social con la incorporación de una agenda ambiental en el arco reivindicativo de la CSA, especialmente entre 2009 y 2014.

El objetivo de este artículo es contribuir con un debate aún en ciernes abordando tanto las acciones como las narrativas de las organizaciones sindicales en el plano regional, no tan sólo en referencia a las contradicciones propias del conflicto capital-trabajo sino asimismo, en la contradicción inserta en las condiciones de reproducción de la clase trabajadora que incluye la dimensión socio-ambiental y territorial.

Con un abordaje cualitativo y un enfoque socio político de investigación social, este trabajo es resultado de la combinación de distintas técnicas de recolección de información. Ello incluye la realización de una docena de entrevistas con dirigentes de la CSA, referentes de movimientos sociales aliados e informantes clave realizadas durante 2016, así como un cúmulo de registros empíricos recogidos en diversos eventos convocados por la CSA entre 2013 y 2017. Conjuntamente, se analizan materiales y documentos producidos por la CSA, la CSI y por movimientos sociales en el plano regional; un seguimiento, sistematización y análisis de comunicados e informes de estas organizaciones, diversos medios de prensa y fuentes de información oficial.

Primeramente, describiremos brevemente el caso de estudio para luego introducir algunos debates conceptuales en torno a la relación del sindicalismo, la problemática socio-ambiental, y el giro eco-territorial de la acción colectiva en América Latina, abordando las nociones de transición justa y justicia climática. Finalmente, reflexionaremos sobre la reinterpretación latinoamericana de la noción de “transición justa” desde fines de la década pasada hasta el acuerdo sobre el clima alcanzado en la COP 21 de París en 2015.

A partir de entonces se observa un eclipse de los temas ambientales de la agenda sindical en el plano regional. Así, las demandas se han concentrado en la defensa de la democracia, los derechos humanos y las críticas al neoliberalismo ante el giro conservador en las políticas laborales y de integración regional luego de 2015, con el triunfo electoral de una alianza conservadora en la Argentina y el golpe de Estado en Brasil. Las preocupaciones ambientales, en este escenario, ingresaron en cierta letanía en relación con otras problemáticas que asumieron los movimientos obreros locales y regionales en el nuevo contexto político.

1. *El caso[[3]](#endnote-4)*

La Confederación Sindical de las Américas (CSA) es una filial regional de Confederación Sindical Internacional (CSI).[[4]](#endnote-5) Su ámbito de representación abarca América del Norte, Centroamérica, Caribe y Sudamérica. La integran 57 centrales sindicales nacionales de 23 países, que suman más de cincuenta millones de trabajadoras/es afiliados. Al agrupar a las centrales sindicales nacionales –que a su vez reúnen a sindicatos por rama o empresa de todos los sectores de actividad–, su ámbito de representación es profundamente heterogéneo y abarca organizaciones que nuclean a trabajadores urbanos y rurales, del sector privado y del sector público, de la industria y los servicios.

La CSA es una organización de reciente creación que se desarrolló al calor de un espacio regional alternativo a la globalización neoliberal, en un contexto particularmente propicio luego de casi una década de crecimiento económico, disminución del desempleo y la pobreza en varias naciones del continente. Creada en 2008 en el marco de una crisis internacional de larga duración y múltiples dimensiones, esta organización emergió como un actor sociopolítico a tono con los lineamientos promovidos desde los gobiernos progresistas y de izquierda latinoamericanos que para entonces se encontraban en pleno despliegue.

La estrategia de acción de la CSA no se limita a las reivindicaciones económico-corporativas del sindicalismo tradicional. Por el contrario, la convocatoria a una autorreforma[[5]](#endnote-6) que prioriza la democratización y unidad del movimiento sindical, la decisión de intervenir activamente en el terreno sociopolítico sin perder autonomía y la construcción de un amplio arco de alianzas con movimientos sociales (campesinos, ambientalistas, feministas), resulta clave para comprender tanto su narrativa como sus proposiciones y acciones políticas.

La magnitud del ámbito de representación de la CSA debe ser abordada teniendo en cuenta su vasta extensión territorial y la radical heterogeneidad que surge, por un lado, de las matrices productivas, mercados de trabajo, tamaño de las economías nacionales en los países del continente y, por el otro lado, de las diversas tradiciones organizativas e ideológicas que tensionan su dinámica interna. En este sentido, su condición de organización internacional y de tercer grado marca límites en su accionar e impacto sobre el conjunto de trabajadoras y trabajadores que representa formalmente.

1. *Sindicatos y demandas socio-ambientales*

El movimiento obrero se ha caracterizado por orientar su acción hacia la defensa de los derechos sociales y económicos de los trabajadores en el marco de las relaciones productivas capitalistas.

Pero la extensión de la sociedad de consumo en el siglo XX no ha estado únicamente relacionada con la ampliación de fuentes de trabajo sino, a su vez, con la factibilidad de acceso a bienes y servicios para los trabajadores. Como observa Unceta (2009), el legado del pensamiento clásico ha sido, como herencia retomada en el siglo siguiente, el predominio de una perspectiva productivista sobre el crecimiento y el bienestar social, cuya prestancia como relato y práctica económica y política habrá de dar origen, en las últimas décadas del siglo XX e inicios del XXI, a una serie de críticas eco-socio-ambientales sobre los efectos que ha conllevado dicha visión del desarrollo.

En este marco deben ser comprendidos el surgimiento y consolidación de los movimientos ecologistas o ambientales, que junto con los movimientos estudiantiles, feministas o pacifistas aportaron nuevas coordenadas de acción e intelección de lo social en términos políticos, culturales y simbólicos (Svampa, 2016) En el plano internacional, el movimiento ambiental tomó impulso a partir de la creación de un espacio específico de negociaciones intergubernamentales.

En estos espacios se difundieron nuevas demandas y narrativas. Entre ellas destacamos el movimiento por la justicia ambiental que surgió en la década de 1980 en Estados Unidos contra la localización de instalaciones contaminantes, en particular, plantas para el tratamiento de residuos en barrios pobres habitados por población afro descendiente y latina (Borras, 2016; Martínez Allier, 2016).

El concepto de justicia ambiental se internacionalizó bajo la noción de “justicia climática”, y cobró gran relevancia como respuesta desde los países del Sur y la sociedad civil a las posiciones de las mayores potencias en las negociaciones sobre cambio climático. Proveyó de una perspectiva crítica al enfoque dominante de la “economía verde” [[6]](#endnote-7) para aquellos que entendían que la pobreza es el principal problema ambiental. En otros términos, la idea de justicia climática repuso la dimensión distributiva y conectó directamente crisis climática con justicia social, al centrar el análisis en las causas del cambio climático y las transformaciones sistémicas requeridas, planteando la necesidad de establecer criterios de justicia en la distribución de los recursos atmosféricos (Borras, 2016).

Resulta de interés constatar que la incorporación de las demandas de justicia climática por parte del movimiento sindical internacional fue mucho más tardía, a medida que se fue consolidando la participación y presencia de las organizaciones del trabajo en los espacios de negociación formal y de acción colectiva internacional ambiental.

A nuestro juicio, esto se relaciona con el carácter conflictivo que asumieron las relaciones entre movimiento sindical y movimiento ecológico en los países desarrollados. Autores como Recio (2015) sostienen que mientras los sindicatos apuestan por políticas de crecimiento económico y establecen sus disputas en la arena distributiva de la renta, el movimiento ecologista, en cambio, ha evidenciado las limitaciones naturales que contiene la expansión de la actividad productiva. Los desencuentros entre sindicalismo y ecologismo se han retroalimentado aún más dada una situación social en la cual la mayoría de la población no controla los mecanismos por los cuales los empleos se pueden ajustar a las necesidades, y por tanto las demandas ecologistas son vistas como restricciones a la producción que ocasionan problemas de empleo.

Una forma de acercarse a esta problemática estuvo fundamentalmente relacionada con la relación entre salud, ambiente y condiciones de trabajo en el espacio productivo. Como sostiene Serrano Llorenc (2013), la salud laboral habría sido el punto de encuentro más cercano entre sindicalismo y medio ambiente, mientras la agenda ambiental se ha desplegado con dificultades y desencuentros con el movimiento ambientalista y ecologista.

Las organizaciones sindicales contemporáneas se encuentran en este contexto atravesadas por un conjunto de contradicciones que condicionan y reorganizan sus luchas reivindicativas. Inmersas en la segunda contradicción del capital en términos del marxismo ecológico de O Connor (2001)[[7]](#endnote-8), los conflictos por la explotación y apropiación de los frutos del trabajo dominan su espectro confrontativo. Pero la explotación y apropiación creciente de los recursos de la naturaleza por parte del capital y los efectos perniciosos sobre las condiciones de producción afectan a los trabajadores como clase en sus circunstancias de vida y reproducción social como actores colectivos. Junto con los conflictos distributivos clásicos se suman en la actualidad, en términos de Martínez Allier (2008) los conflictos distributivos ecológicos crecientes vinculados con la extracción, transporte de materias primas, contaminación local/ regional, exacerbando las relaciones de desigualdad y asimetría entre sectores dominantes y subalternos en los territorios y en las comunidades.

Ahora bien, esta no es una cuestión de simple abordaje para el mundo sindical. En la cosmovisión productivista del desarrollo, la naturaleza es vista como recurso, como mercancía, como insumo productivo y como proveedora de trabajo. Se extreman en el discurso dominante dicotomías problemáticas, donde la defensa de los derechos de la naturaleza se coloca en las antípodas de los derechos al trabajo. Los bienes de la naturaleza se transforman así para satisfacer necesidades humanas, aunque en el proceso de esta trasmutación los trabajadores recrean contradictoriamente la posibilidad que el capital reproduzca su dominación y al mismo tiempo resulten afectadas las condiciones de vida de los grupos subalternos.

En las últimas décadas, no obstante, actores sindicales de distintos niveles de organización se han involucrado con mayor compromiso en las problemáticas y discusiones socio-ambientales. Como analizan Snell y Fairbrother (2010), confederaciones como la CSI y las federaciones sindicales internacionales (actualmente conocidos como sindicatos globales) se han pronunciado con respecto a los efectos perniciosos del cambio climático llevando sus posiciones en diversos foros internacionales. Los autores advierten concomitantemente experiencias nacionales que traducen diversas preocupaciones de este carácter promovidas por estos agrupamientos, particularmente en los países desarrollados. Y aunque los sindicatos se encuentran tensionados en relación con la incorporación de la problemática ambiental por un lado, y la reproducción de intereses y recursos materiales por el otro, detentan un rol privilegiado como actores ambientales en la persecución de empleos decentes que incorporen esta temática dentro de su agenda reivindicativa.

Para el caso de América Latina, como refiere Svampa (2015) la cuestión ambiental experimentó un proceso de resignificación que dio origen a un conjunto diverso de movimientos socio-territoriales que orientaron sus demandas y configuraron sus disputas hacia los actores privados y el Estado.

En este contexto podemos inscribir la posición que adoptó la CSA desde su creación en 2008 con referencia a la cuestión ambiental. Las problemáticas socio territoriales entraron en su agenda en el marco de un nuevo paradigma internacionalista basado en los principios de autorreforma sindical y puesta en práctica de un sindicalismo sociopolítico (Anigstein, 2016).

Para ello la CSA se nutrió considerablemente de la vinculación establecida entre actores sindicales y movimientos socio-ambientales en el territorio.

1. *Confluencias: entre la transición justa y la justicia climática*

En rigor, aunque de un modo incipiente y sin mayores resultados, desde hace al menos dos décadas el movimiento sindical se ha involucrado en los debates en torno al cambio climático. En Europa, los programas de transición energética colocaron inmediatamente a los sindicatos en alerta. La preocupación inicial giró en torno al futuro de los puestos de trabajo y de los trabajadores en las actividades económicas que quedaron en el foco de las políticas de transición. Lo que en un primer momento se reveló como una preocupación de los trabajadores organizados de los países industrializados de Europa, muy pronto impregnó las agendas del movimiento sindical global. En otras palabras, los trabajadores del Norte, muy probablemente por su hegemonía histórica en el movimiento sindical internacional, colocaron en el debate el problema de la crisis climática y sus salidas desde la perspectiva de los trabajadores.

Las preocupaciones y demandas en materia medioambiental se fueron acomodando a los términos de debate tal como se desplegó en los países de mayor industrialización y en los organismos multilaterales donde los sindicatos tienen presencia. Estos demandaron ser parte de los espacios donde se definen las modalidades de transición energética y sostuvieron que la misma no puede tener lugar a costa de los trabajadores de las actividades que deben ser reconvertidas (industria del carbón, petróleo, energía nuclear, entre otros).

La experiencia europea fue trasladada al plano global de la acción y los sindicatos reclamaron un lugar en las COPs, para poder hacer escuchar sus demandas. Paralelamente, el proceso de fusión de las organizaciones internacionales durante la primera década de este siglo contribuyó a darle una presencia más homogénea.

Incluso, la CSI (creada en 2006) logró colocarse formalmente en las negociaciones sobre el clima en 2008, junto al resto de las organizaciones de la sociedad civil, con quienes articuló acciones y posicionamientos en el ámbito de las negociaciones oficiales, pero también al margen, participando en instancias alternativas, contra-cumbres y movilizaciones que pusieron en juego una visión crítica acerca de las intenciones y resultados de las COPs (véase Cuadro II).

Mientras tanto, en otras regiones del mundo las luchas medioambientales tomaron características muy diferentes. Los efectos del cambio climático fueron creciendo significativamente en territorios que poco o nada habían aportado en las causas antropomorfas que originaron dichos efectos. Y así, desertificación, desaparición de islas, plagas y epidemias han ido afectando progresivamente amplias poblaciones en países donde el acceso a la energía no está garantizado para la mayoría de las personas (Maffei y Llanos, 2010).

Nuevos movimientos sociales surgieron entonces al calor de las nuevas demandas. El concepto de justicia ambiental y/o climática que plantea responsabilidades comunes pero diferenciadas[[8]](#endnote-9), se erigió en el debate sobre la transición en los foros multilaterales y en los espacios alternativos impulsados por estos movimientos.

En el escenario global nos encontramos entonces con dos categorías que lograron atravesar los muros entre los cuales se reúnen los poderosos del mundo: justicia climática y transición justa. El primero, surge del derecho al desarrollo de las poblaciones empobrecidas de los países del norte y de las mayorías de los países del sur. El segundo, la transición justa, se originó en el seno del movimiento obrero, y se inserta en la contradicción capital-trabajo. Ambos conceptos experimentaron una metamorfosis desde sus formulaciones iniciales directamente vinculadas con luchas sociales y de clase para poder ser retraducidos en los ámbitos de la institucionalidad global.

Los actores que encarnan estas nuevas demandas mostraron entonces una doble capacidad: ser parte de los movimientos sociales y políticos que se constituyeron como una crítica y alternativa al paradigma emergente de la “economía verde” por un lado, y, por el otro lado, ser capaces de traducir estas nuevas demandas en los términos del dialogo social global, en el marco del sistema de Naciones Unidas, con el fin de incorporarlas, aunque de modo subordinado y con muchas dificultades, en los debates que encararon principalmente los gobiernos y las grandes corporaciones trasnacionales.

4.1. Hacia una *Transición Justa*

En el plano global la CSI ha incorporado entre sus demandas la cuestión climática, resultando su principal estrategia de acción fue de índole institucional. Para ello, apeló a construir alianzas con partidos socialdemócratas, organizaciones empresarias, religiosas y ONGs. La noción de “transición justa” tiene sus orígenes en documentos de sindicatos canadienses que hacia fines de los años 90 la definían como una forma de conciliar empleos dignos con la protección del medio ambiente. Desde allí, esta propuesta se fue consolidando y su inclusión en la agenda propositiva ambiental de la CSI buscó ganar espacios y apoyos en los encuentros internacionales sobre el cambio climático. (Gouverneur y Netzer, 2014).

La transición justa ha sido analizada además como un significante vacío que engloba distintas estrategias socio-ecológicas, parcialmente conflictivas, de las organizaciones sindicales internacionales que coexisten en torno a un compromiso general u horizonte común de abordar el cambio climático. Esta noción tiene la particularidad de combinar las demandas clásicas del movimiento sindical internacional ligadas al principio de justicia social y empleo decente con una renovada preocupación por los efectos del cambio climático, conforme las definiciones de los organismos multilaterales (Felli, 2013).

La CSI y los sindicatos globales son los principales impulsores de lo que Felli (2013) define como estrategia deliberativa, que se inscribe en el paradigma de la modernización ecológica (transición hacia una economía verde con sostenibilidad ecológica, económica y social) y se encuentra estrechamente asociada con la noción de empleos verdes[[9]](#endnote-10) defendida por organismos multilaterales como la OIT y el PNUMA. Inscripta en este paradigma, la transición justa se reduce a exigir la participación de los sindicatos en los debates sobre la aplicación de medidas para combatir el cambio climático y localiza el poder de transformación en la “voluntad” de los políticos. Es por eso que en el marco de la estrategia deliberativa, la elaboración programática en torno al cambio climático se encuentra dictada por los tiempos y términos de las negociaciones, conferencias y cumbres internacionales.

Para Maite Llanos –responsable del Grupo de Trabajo y Medioambiente de la CSA entre 2008 y 2010 y actualmente directora asistente en CSI–, la noción de transición justa se mostró asimismo fructífera como un concepto necesario para que el sindicalismo internacional lograra instalar en los textos de las negociaciones internacionales una posición corporativa respecto del cambio climático y con el propósito de obtener, de este modo, recursos financieros e influir en la definición de políticas nacionales (entrevista realizada por las autoras en agosto de 2017).

Para la CSI, transición justa significa por tanto garantizar la transformación hacia una economía baja en la generación de carbono mediante un proceso de inclusión donde no resulten los trabajadores los sectores más afectados. Los sindicatos se proclaman en este esquema como agentes centrales en el diseño y seguimiento de políticas de transición que permitan generar y mantener empleos decentes, de acuerdo con los lineamientos publicados en el sitio web oficial de la confederación mundial.

La propuesta considera entre algunos de sus puntos: 1) estimular inversiones significativas para formular políticas industriales dirigidas a crear y conservar puestos de trabajo decentes y “verdes”, favoreciendo que los lugares de trabajo resulten más ecológicos; 2) realizar investigaciones y evaluaciones tempranas sobre los efectos de la transición en los empleos; 3) participación y consulta activa a los sindicatos, empleadores, y comunidades afectadas por la transformación; 4) promover planes de protección social y políticas activas en el mercado de trabajo para asistir a los sectores más vulnerables en el proceso de la transición.[[10]](#endnote-11)

Como puede observarse en el cuadro II si bien una delegación de la CSI integrada por alrededor de 100 sindicalistas participó por primera vez en la COP 14 de Poznan (2008), fue mucho más significativa la participación en la COP 15 realizada en Copenhague en 2009. Aquella cumbre, sin embargo, fue un fracaso ya que no se alcanzó con la expectativa general de llegar a un acuerdo vinculante. Las tensiones se intensificaron cuando los representantes de la sociedad civil fueron excluidos de la sala de conferencias. A pesar de todo esto, la CSI celebró el reconocimiento de los sindicatos dado que la transición justa fue incluida en el orden del día.

Sin embargo, a nuestro juicio, fue aún más significativa la participación sindical en un multitudinario foro alternativo y movilización que constituyó un hito en el movimiento global contra el cambio climático y reunió a más de 100 mil personas. El involucramiento del movimiento sindical (con una delegación integrada por más de 400 sindicalistas) en la contra-cumbre quedó plasmado en su declaración final, donde se señaló la necesidad de avanzar hacia una transición justa y duradera, en torno a un modelo que garantice el derecho a la vida y a la dignidad de todos los pueblos.

Las demandas enarboladas por la CSI en Copenhague fueron esta vez un poco más amplias que en el 2008. Junto con la idea de una “transición socialmente justa”, empleo verde y decente, apareció por primera vez con fuerza la promoción de un fondo mundial para la protección social de los países más pobres (una demanda sostenida por los movimientos ambientalistas e impulsada por los sindicalistas de América Latina). Un año más tarde, en la COP 16 de Cancún, la demanda del fondo mundial incluyó una fuerte crítica al mercado de carbonos y una propuesta de financiamiento público a través de la creación de un impuesto a las transacciones financieras administrado por la ONU, sin injerencia de organismos financieros como el Banco Mundial.

En las sucesivas COPs se fue gestando un mayor acercamiento con los movimientos sociales y ONGs comprometidas con el principio de responsabilidades comunes pero diferenciadas; y una mayor influencia de los sindicalistas latinoamericanos. De hecho, entre los eventos organizados por los sindicalistas en el marco de la cumbre, se destacó uno organizado por la CSA sobre justicia social y climática.[[11]](#endnote-12)

Otro hito de significación fue la inédita introducción del combate al cambio climático en las resoluciones del 2do. Congreso de la CSIrealizado en junio de 2010(Comunicado de prensa de CSI, 25/06/2010). A partir de allí, se observa un mayor interés del sindicalismo internacional por los temas medioambientales. La CSI habrá de priorizar sus alianzas con importantes ONGs con presencia transnacional (como Oxfam y Friends of theEarth) e inclusive con organizaciones de empresarios. La CSA, en cambio, estrechará lazos con movimientos populares con presencia regional.

A partir de 2013 la CSI incorporó la Justicia climática como una de sus prioridades, junto a la transición justa.

Las demandas y acciones de esta organización hacia 2015, con el acuerdo de París en ciernes, mostraron algunos logros que dan cuenta de los éxitos de la estrategia deliberativa de esta expresión del sindicalismo internacional: 1) la transición justa ingresó en el texto de las negociaciones oficiales (aunque solo de modo meramente enunciativo), 2) se logró una fuerte confluencia con las agendas de las ONGs vinculadas a transición justa y justicia climática y 3) la OIT adoptó y definió el concepto de transición justa.

*5. Una relectura desde América Latina*

Por su parte el sindicalismo latinoamericano, especialmente la CSA en articulación con las centrales brasileras y otros movimientos sociales, jugaron un rol protagónico en la contra Cumbre y movilizaciones realizadas en Río de Janeiro en 2012.

Río+20 constituyó un segundo hito, luego de Copenhague, en el movimiento global contra el cambio climático a pesar, una vez más, del fracaso de las negociaciones oficiales. A diferencia de 2009, en Río+20 las reivindicaciones estuvieron fuertemente impregnadas de las nuevas narrativas emergentes al calor del giro eco-territorial de las luchas en el continente, y así quedó plasmado en su documento final.[[12]](#endnote-13)

Distintos testimonios enfatizan además el punto de inflexión que significó la Cumbre para la confluencia y articulación entre movimiento campesino, feminista, ambientalista y sindical. Concretamente, la contra cumbre convocada de forma paralela a la reunión oficial de Río+20 alentó un nuevo acercamiento de la CSA con CLOC-Vía Campesina, Marcha Mundial de Mujeres, Jubileo Sur y REDES-Amigos de la Tierra América Latina. Para el movimiento campesino se trató de una “alianza estratégica” que ligó las demandas del conjunto de la clase trabajadora, tanto urbana como rural. Los ambientalistas lo llaman “caminar juntos” y el feminismo popular de la Marcha mundial enfatiza el carácter múltiple (feminista, clasista, de raza) que conjugan hoy las luchas de las mujeres en el continente[[13]](#endnote-14).

Lo mismo puede afirmarse respecto de la Cumbre de los pueblos de Lima, realizada en el marco de la COP 20, en 2014. Rio +20, para el sindicalismo Latinoamericano se constituyó incluso en un punto de inflexión con relación a los debates socio-ambientales al lograr colocarse en agenda las problemáticas propias de los países de la región y de los empleos que los caracterizan[[14]](#endnote-15).

Juan José Gorriti, dirigente de la Confederación General de Trabajadores del Perú (CGTP),con fuerte presencia tanto en la contra cumbre paralela a la COP 20, como en la masiva movilización, reflexionaba así sobre la relación de los sindicatos y el movimiento ambientalista: “Es la primera prioridad colocar en la agenda permanente del movimiento sindical al cambio climático. La segunda es articular nuestras luchas con las de los pueblos originarios. Y no solamente con los pueblos originarios, sino con las de todos aquellos sectores que luchan por el cambio […] Para lo que los compañeros indígenas le llaman el Buen vivir, para la soberanía alimentaria, para el respeto y el cuidado de la naturaleza. Creo que el movimiento sindical tiene ahí un rol interesante, importante y fundamental” (entrevista realizada por autora en diciembre de 2014).

No puede perderse de vista que, a diferencia de los países centrales, la región de América Latina no contribuye significativamente en la emisión de gases de efecto invernadero. Sin embargo, las consecuencias del cambio climático ya están impactando fuertemente en la región. Como señalan Maffei y Llanos (2010), la modificación en el patrón de las precipitaciones y el derretimiento de los glaciares incidirán sobre la disponibilidad de agua para el consumo humano, el riego en la agricultura y la generación de energía hidroeléctrica. En la salud se advierte una prolongación en el tiempo de transmisión de enfermedades como el dengue y la malaria. Se espera así mismo la sabanización de la región amazónica y desertificación de las regiones semiáridas. Los empleos del sector pesquero, el turismo y el agrícola se verán impactados sustantivamente por este proceso.

Al mismo tiempo, y como señalan Gudynas y Honty (2014), el incremento en las reservas de recursos de gas y petróleo no convencional complejizan el escenario de mediano y largo plazo: los procesos extractivistas denominados de “tercera generación”, tales como los proyectos de explotación minera a cielo abierto, la perforación petrolera en la Amazonía o la expansión de los monocultivos, se amplificaron en la región en las últimas décadas; mientras que algunos países como Colombia y Argentina avanzan en el extractivismo de “cuarta generación” ligado a la producción de hidrocarburos no convencionales a través de la técnica del Fracking.

En este marco, las demandas sindicales y ambientales de la CSA adoptaron algunos lineamientos específicos que introducen matices y resignificaciones al enfoque global promovido desde la CSI.

Acorde con la orientación de la organización de nivel superior, inmediatamente después de su creación, la CSA adopto el concepto de transición Justa (Maffei y Llanos, 2010). En el marco de La II Conferencia Sindical Trabajo y Medio Ambiente en América Latina y el Caribe, convocada por la CSA en 2009, se adoptó una declaración donde se asientan algunas bases que asocian esfuerzos para enfrentar el cambio climático en conjunción con reivindicaciones centradas en la desigualdad e injusticia social.[[15]](#endnote-16) Con este nuevo enfoque, la organización sostiene que ocuparse del cambio climático implicó al mismo tiempo reconocer la profunda crisis que atravesaron los países de América Latina en las últimas tres décadas como producto de las políticas neoliberales de libre circulación de capitales, apertura comercial, flexibilidad laboral y pérdida de soberanía del Estado. Se propuso revisar los acuerdos de libre comercio, exigir a los países desarrollados la reducción de gases contaminantes, la transferencia de tecnologías limpias a los países del Sur para promover procesos productivos ambientalmente sustentables, limitar los procesos de deforestación ligados a la extensión de los monocultivos y el uso abusivo de agro-tóxicos. Estos planteos presentes en aquella propuesta iniciática traducen la preocupación de como pensar desde las múltiples problemáticas ambientales y políticas que aquejan a la región la cuestión del cambio climático.

Pocos meses después, en abril de 2010, se convocó la Cumbre Mundial de los Pueblos sobre el cambio climático y los derechos de la Madre Tierra que reunió a más de 30 mil activistas de todo el mundo en Cochabamba, Bolivia. Fue impulsada por Evo Morales, luego del fracaso de Copenhague. Si bien el movimiento sindical tuvo una participación minoritaria, no puede perderse de vista su relevancia, tomando en consideración las repercusiones que tuvo a nivel global, así como también el creciente interés que fue adquiriendo la cuestión ambiental en el continente. Allí se visibilizaron las propuestas de los pueblos originarios y la importancia de los movimientos indígenas en América Latina. Asimismo, colocó con fuerza en el debate nociones como madre tierra, buen vivir, nuevas formas de relación entre la humanidad y la naturaleza, opuestas a la mercantilización de la vida (Antentas y Vivas, 2010).

Mientras tanto, la CSA proponía el debate sobre los modelos de desarrollo en el centro de su estrategia de acción sociopolítica. Como parte de las resoluciones de su II Congreso, realizado en Santiago en 2012, se instruyó la construcción de un programa alternativo de desarrollo, capaz de sintetizar las aspiraciones y horizontes de transformación del conjunto de las organizaciones nucleadas. Aspiraba ser al mismo tiempo resultado de una discusión democrática.

Para lograrlo, se proyectó una metodología de trabajo que constaba de un cronograma de reuniones a lo largo de un año con amplia participación de las centrales sindicales afiliadas, las fraternas y los movimientos sociales y ONGs aliados, rondas de consultas periódicas a todas las afiliadas y tratamiento en los órganos de conducción (Consejo Directivo y Secretariado). Se convocaba a las organizaciones y movimientos aliados a involucrarse en el debate y ofrecer sus puntos de vista.

Desde un comienzo se definieron cuatro dimensiones que debía abarcar el programa: político, económico, social y ambiental, con el fin de garantizar su integralidad. En torno a esos cuatro aspectos, los participantes del debate fueron aportando nuevos temas, colocando matices o revisando viejas concepciones, hasta lograr la construcción de un consenso en torno al contenido general del documento. El resultado fue la Plataforma del Desarrollo de las Américas (más conocida como PLADA).[[16]](#endnote-17)

Su contenido no se acotó al universo de las demandas sociolaborales, sino que allí se propuso una estrategia de desarrollo desde y para los pueblos como alternativa frente a la actual crisis múltiple que experimentan las sociedades capitalistas en nuestro continente: financiera, de los sistemas de protección social, del trabajo y los cuidados, migratoria, climática, energética y alimentaria. Su contenido intenta prefigurar senderos de transición hacia un modelo sustentable.

El punto de partida sostenido en este documento: la salida de la crisis global requiere una respuesta estructural con participación de los sindicatos y movimientos populares. Las soluciones de mercado fracasaron. Los Estados deben retomar el control y poder sobre la economía y reconstruir su capacidad para satisfacer las necesidades sociales.

En su pilar medioambiental la PLADA de la CSA demanda una transición justa y –en sintonía con las demandas de los pueblos originarias y el movimiento ambientalista–justicia ambiental, defensa y preservación de los bienes comunes, derecho al agua, soberanía energética con matriz sustentable y un nuevo paradigma de producción, distribución y consumo con sustentabilidad ambiental presente y futura.

Este documento es el resultado de un movimiento sindical heterogéneo que representa la diversidad de mundos del trabajo de la región. Sin lugar a dudas constituye uno de los rasgos que distinguen a los sindicatos latinoamericanos de las organizaciones gremiales de los países desarrollados. Así, en la propuesta de la CSA confluyeron tradiciones sindicales distintas, liderazgos y equipos dirigenciales con orígenes y trayectorias sumamente dispares, y una interpretación y articulación de demandas que responden a problemáticas de integración socio laboral que singulariza a los países de la región. Amplios sectores informales, existencia de formas de autogestión y cuentapropismo que se destacan sobre otras modalidades de empleo, tasas elevadas de sindicalización y formalización de relaciones laborales urbanas (caso de la Argentina por ejemplo) en algunos países y no en otros.

La “justicia ambiental”, ligada a un programa de desarrollo alternativo debe enfocarse para la CSA en el reconocimiento de las asimetrías entre clases sociales y entre países del Norte y el Sur que dispone un modelo de desarrollo con efectos desiguales para las distintas poblaciones. Requiere distinguir las responsabilidades mayores que tienen algunos países sobre los daños ambientales y en el apoyo financiero de procesos de transición justa que asegure un acceso igualitario al goce de los pueblos de los bienes comunes (como la biodiversidad, el agua, las semillas, los bosques, la energía y el conocimiento), de la naturaleza y los espacios verdes. La autodeterminación de los pueblos sobre estos bienes comunes es otra de las ideas fuerza en esta concepción, así como merece su repudio la megaminería a cielo abierto. Asimismo, se reafirma el acceso al agua como un derecho humano y la necesidad de construir una matriz energética sustentable considerando la crisis del cambio climático y el agotamiento de recursos energéticos convencionales. Se alude críticamente al uso de técnicas contaminantes para la extracción de hidrocarburos no convencionales con la excusa de su necesidad energética, y se alienta la exploración y producción de energías renovables.

En suma, la “transición justa” se declara como un objetivo prioritario del movimiento sindical, retomando para ello la propuesta que es común al sindicalismo internacional y que sin dudas fue nutrida y enriquecida por la CSA. Esta organización adoptó y vertebró su debate en torno a este concepto, en parte, como una estrategia política de cara a un sindicalismo internacional donde los europeos y los norteamericanos detentan una fuerza de presión mayor que los sindicatos del Sur. Un rol activo y soberano del Estado en la distribución de la riqueza y en materia de desarrollo, justicia ambiental e integración de los pueblos en este proceso se asumen como una condición indispensable.

Ahora bien, la CSA integró las distintas delegaciones de la CSI en las COPs como filial regional. Sin embargo, no es posible detectar matices entre la representación mundial (hegemonizada por el sindicalismo europeo) y las delegaciones latinoamericanas, si atendemos únicamente a los documentos y boletines publicados por la CSI, que son producto de delicadas negociaciones y contienen tanto los consensos como las tensiones internas. Estos matices se visibilizaron en el marco de entrevistas o bien en observaciones directas, en distintas instancias de debate. Con todo, la perspectiva latinoamericana se revela cada vez que las negociaciones oficiales se desarrollaron en países de la región, lo que implica en efecto una mayor participación latinoamericana en la organización, convocatoria, logística y asistencia a los eventos, activos políticos (alianzas y redes con otros movimientos) así como también capacidad de movilización. En esos casos, las demandas suscriptas por el movimiento sindical y su participación en acciones colectivas mostraron algunas líneas de discontinuidad con las posiciones esgrimidas en aquellas ocasiones donde las negociaciones se desarrollaron en otras latitudes (como queda expuesto en el Cuadro II).

Adicionalmente, el análisis de fuentes de la CSA y testimonios orales de dirigentes, asesores y referentes de organizaciones aliadas, permite concluir que efectivamente la transición justa y el conjunto de demandas ambientales del sindicalismo han experimentado ciertas mutaciones en nuestra región, lo que en definitiva redundó en algunos cambios en la programática de la organización mundial.

En efecto, las Cumbre Río+20 (2012) y Lima (2014) constituyen dos hitos en este proceso, aunque es cierto que el gran movimiento desatado en torno al fracaso de las negociaciones en Copenhague en 2009 fue un punto de inflexión y marcó en lo sucesivo un lustro de movilizaciones crecientes donde las nociones construidas al calor de los movimientos latinoamericanos fueron adquiriendo protagonismo hasta impregnar, aunque de forma limitada, la agenda ambiental del sindicalismo global y el movimiento medioambiental.

1. *Conclusiones abiertas*

Desde 2008 se observa un viraje socio-ambiental en las demandas del movimiento sindical regional. Fruto de sus alianzas con otros movimientos sociales regionales, la CSA ha movilizado una nueva narrativa que coloca en primer plano aquellas dimensiones asociadas con la segunda contradicción del capital, conceptualizada por O Connor (2001) en su perspectiva marxista ecológica. La crisis climática ha puesto en cuestión la reproducción de condiciones que generan formas de explotación y alienación nucleares al desarrollo del capitalismo.

En este esquema, el enfoque de los “empleos verdes” (que ha sido parte de la narrativa medioambiental del sindicalismo europeo a fines de la década pasada) chocó rápidamente con matrices productivas y mercados de trabajo que contrastan con las realidades de los países desarrollados. Efectivamente, el grupo de dirigentes y técnicos que se vincularon con la problemática del cambio climático desde la organización sindical de la CSA fue reformulando sus posiciones a medida que la interacción con otros movimientos sociales de la región se tornaba cada vez más fluida. El acercamiento con el movimiento campesino, feminista y medioambiental de América Latina puso de manifiesto problemáticas y desafíos no contemplados en la agenda las Naciones Unidas.

La producción de agro-combustibles o los grandes proyectos hidroeléctricos, por ejemplo, obligaron a repensar el carácter sustentable de algunas fuentes de energía renovables en nuestra región, cuando son puestos en cuestión por las demandas de las comunidades afectadas (indígenas, campesinos, productores de la agricultura familiar, pesca artesanal, entre otros).

En este tipo de explotación se superponen una serie de efectos negativos, como el desplazamiento o migración forzosa de comunidades, la super-explotación del trabajo, destrucción de las economías, mercados y puestos de trabajo locales, represión estatal y para-estatal, mayor pobreza y desigualdad social.

Un aspecto no revisado en el presente texto y que sin dudas requiere indagaciones futuras, se liga con la relación entre las demandas ambientales regionales de la CSA y los sindicatos a nivel local. En efecto, es posible hipotetizar que esta relación es por demás compleja, y aquello que el sindicalismo supranacional pudo adoptar como una preocupación vertebral y de vanguardia, colisiona con acciones sindicales locales que se relacionan con las condiciones de su reproducción de modo conflictivo y contradictorio: los bienes naturales son mercancías apropiables por el capital y dispuestos por el trabajo para su explotación. Ejemplo de ello es la posición de diversos sindicatos nacionales ante el extractivismo y la perspectiva neodesarrolista de distintos gobiernos progresistas de América Latina, que ha generado tensiones al interior de la CSA, resuelto en el plano enunciativo pero de consensos precarios cuando los modelos de desarrollo han acentuado la explotación de recursos naturales y la inserción de los países de la región como productores y exportadores de materias primas en el escenario internacional.

La compleja coyuntura hemisférica que se abrió con el giro neoconservador de gobiernos como el triunfo de Macri en Argentina en 2015, Piñeira en Chile en 2017, de Duque en Colombia en 2018, los golpes de Estado en Paraguay en 2012, en Brasil en 2016, ha puesto al movimiento sindical y a los movimientos sociales en alerta. Asimismo, la ofensiva de las grandes corporaciones transnacionales y del gobierno de Estados Unidos está tomando forma a través del impulso de la profundización de la política de tratados bilaterales de libre comercio, que afectan a las economías emergentes del continente y amenazan con desmantelar y transformar los procesos de integración regional, algunos gestados recientemente (UNASUR, ALBA) y otros ya consolidados (MERCOSUR).

Frente a este nuevo escenario continental, los movimientos sociales junto al movimiento sindical regional, están elaborando una estrategia que Rafael Freire (integrante del secretariado que conduce la CSA) ha definido como “resistencia programática”[[17]](#endnote-18). Este concepto comprende la identificación de dos tiempos. El primero refiere a la coyuntura de ofensiva del capital y al cambio en la correlación de fuerzas sociales que coloca a los pueblos en plano resistente de la acción colectiva. El segundo tiempo es retrospectivo, y hace referencia a la acumulación de conquistas sociales y a los procesos de organización y politización de la clase trabajadora y el conjunto de los sectores populares a lo largo del ciclo 2002-2015.

Resta por analizar en futuras investigaciones como se producirán, trastocarán o acentuarán alianzas sociales entre el sindicalismo regional y los movimientos eco territoriales en la región, y de qué manera la agenda socio-ambiental promovida por la CSA continuará revistiendo importancia reivindicativa durante el nuevo ciclo político neoliberal que experimentan varios países de América Latina desde 2015 en adelante. Con esta lectura de la situación, actualmente se está gestando un espacio de convergencia coordinación hemisférica que tiene como principal referente la experiencia de la Alianza Social Continental (ASC) que protagonizó la campaña contra el ALCA y se inscribió como actor en el ciclo de resistencias populares contra el neoliberalismo en América Latina.

Esta articulación, que tomó su primer impulso en la contra-cumbre de Río +20, se replicó en la Cumbre de los Pueblos de Lima, 2014. La CSA integró el grupo de enlace junto con otros movimientos sociales (CLOC-Vía Campesina, Marcha Mundial de las Mujeres, Amigos de la Tierra América Latina y Caribe, Grupo Carta de Belém, Jubileo Sur, Plataforma Boliviana Frente al Cambio Climático), y protagonizaron una multitudinaria movilización: crisis civilizatoria, el calentamiento global y el cambio climático, la agricultura y la soberanía alimentaria, fueron los ejes temáticos.

El nuevo espacio de articulación regional avanzó en su consolidación con la Jornada de lucha continental el 4 noviembre de 2016 y la convocatoria a un gran encuentro en Montevideo en noviembre de 2017, en el cual se reunieron a debatir representantes de centrales sindicales de todo el continente (se destacan por magnitud de su presencia la CTA Argentina, la CUT de Brasil y el PIT-CNT de Uruguay) y activistas de diversos movimientos sociales.[[18]](#endnote-19) Fruto de estas acciones conjuntas, la convergencia entre movimiento sindical, movimiento campesino-indígena, feminista y medioambiental continuó su consolidación.

*Referencias*

Anigstein, Cecilia

2017 “Nuevos horizontes para el sindicalismo hemisférico: La Confederación Sindical de las Américas (CSA)”, *Global TradeUnionProgramme, Divisionfor International Cooperation of Friedrich-Ebert-Stiftung*, (2016-1017): 1-16. <http://library.fes.de/pdf-files/iez/13861.pdf>

Anigstein, Cecilia

2016 “Por un sindicalismo sociopolítico. La plataforma de la Confederación Sindical de las Américas.” *Nueva Sociedad 264 “Proletarios del mundo… ¿y ahora qué? Trabajo y sindicalismo hoy”* (julio-agosto):134-146. <http://nuso.org/articulo/por-un-sindicalismo-sociopolitico/>

Antentas, Josep María y Vivas, Esther

2010 “Justicia climática y justicia social: un mismo combate contra el capitalismo global.” *Ecología política 39.* <http://www.ecologiapolitica.info/?p=4751>

Borras, Susana

2017 “Movimiento para la justicia climática global: replanteando el escenario internacional del cambio climático.” *Relaciones internacionales Número 33,* (octubre 2016-enero 2017): 97-119

Confederación Sindical de Trabajadores y Trabajadoras de las Américas

2009 “II Conferencia Sindical Trabajo y Medio Ambiente en América Latina y el Caribe” (mayo). Sao Paulo: 4 y 5. <http://www.redes.org.uy/wp-content/uploads/2009/05/declaracion-ii-conferencia-sindical-medioambiente-y-trabajo.pdf>

Confederación Sindical de Trabajadores y Trabajadoras de las Américas

2015 “Plataforma de Desarrollo de las Américas (PLADA)”. <http://csa-csi.org/Include/ElectosFileStreaming.asp?FileId=2227>

Confederación Sindical Internacional.

S/f. “Qué es la transición justa”*.* <http://www.ituc-csi.org/IMG/pdf/01-TransitionES.pdf>

Felli, Romain

2014 “An alternative socio-ecological strategy? International trade unions engagement with climate change.” *Journal Review of international political economy, Volume 21:* 372-398. <http://www.tandfonline.com/doi/full/10.1080/09692290.2012.761642?scroll=top&needAccess=true>

Gouverneur, Judith y Netzer, Nina

2014 “¡Toma el timón y endereza el rumbo! Sindicatos por una transición justa”, pp. 337-353, en Lisa Mansdy (ed.), *La situación del mundo* 2014. Informe anual de Worldwatch institute sobre la sostenibilidad: icaria Editorial, <https://www.fuhem.es/media/cdv/file/biblioteca/Situacion_Mundo/2014/Toma-el-timon-y-endereza-el-rumbo-sindicatos_J_GOUVERNEUR_N_NETZER.pdf>

Herran, Claudia

2012 “El camino hacia una economía verde.” *Proyecto Regional de Energía y Clima*. México: Friederich Ebert Stifung. <http://www.flacsoandes.edu.ec/web/imagesFTP/1340319587.documento_fes_09156.pdf>

Honty, Gerardo y Gudynas, Eduardo

2014 *Cambio Climático y Transiciones al Buen Vivir–Alternativas al desarrollo para un clima seguro*. Lima: CLAES y RedGE.

Kiessling, Christopher

2012 “Las limitaciones de la COP 15 frente a la crisis climática global”. *STUDIA POLITICÆ* Número 25 (primavera/verano 2011-2012): 24-83. Córdoba: Publicada por la Facultad de Ciencia Política y Relaciones Internacionales, de la Universidad Católica de Córdoba.

Maffei, Laura y Llanos, Maité

2010 “El cambio climático y el Nuevo Pacto Ecológico Mundial desde la perspectiva de los sindicatos latinoamericanos”. Ecuador: Fundación Friedrich Ebert, FES-ILDIS: 2-5

Martínez Allier, Joan

2008 “Conflictos ecológicos y justicia ambiental”, *Papeles de relaciones ecosociales y cambio global,* Nº 103: 11-27. https://territoriosendisputa.wordpress.com/2014/09/03/conflictos-ecologicos-y-justicia-ambiental-de-joan-martinez-alier-en-pdf/

Martínez Allier, Joan

2016 “La ecología política y el movimiento global de justicia ambiental”, *El mundo que queremos*, Zaragoza: Fundación SIP - Mira editores,

O Connor, James

2001 *Causas naturales. Ensayos del marxismo ecológico*. México: Siglo XXI

Recio, Albert

2015 “Sindicalismo, trabajo, sostenibilidad.” *Revista estudios y cultura*, Nº 70-(abril): 40-45.

# Serrano, Llorenc

# 2013 “Sindicalismo y medio ambiente, nuevos retos” Daphnia, Nº 59 (enero). [**http://www.daphnia.es/revista/59/articulo/1179/Sindicalismo-y-medio-ambiente-nuevos-retos-**](http://www.daphnia.es/revista/59/articulo/1179/Sindicalismo-y-medio-ambiente-nuevos-retos-)

Snell, Darrin y Fairbrother, Peter

2010 “Unions as environmental actors” *Transfer: European Review of Labour and Research,* Volume: 16 issue: 3, pp. 411-424. http://journals.sagepub.com/doi/abs/10.1177/1024258910373874

Svampa, Maristella

2016 *Debates Latinoamericanos. Indianismo, desarrollo, dependencia y populismo*. Buenos Aires: Edhasa

Svampa, Maristella y Viale, Enrique

2014*Maldesarrollo. La Argentina del extractivismo y el despojo*. Buenos Aires: Katz Editores

Unceta, Koldo

2013 “Decrecimiento y Buen Vivir ¿Paradigmas convergentes?”, *Revista de Economía Mundial*, Nº 35: 197-216. http://www.redalyc.org/pdf/866/86629567011.pdf

Wachendorfer, Achim

2007 “¿Hacia una nueva arquitectura sindical en América Latina.” *Nueva Sociedad* N° 211 (septiembre-octubre): 32-49. http://nuso.org/media/articles/downloads/3455_1.pdf

1. Resultados preliminares de esta investigación fueron presentados por las autoras en una ponencia en el XXXI Congreso ALAS (Uruguay, 2017) bajo el título **“Sindicalismo y luchas medioambientales: la transición justa en clave latinoamericana”.** [↑](#endnote-ref-2)
2. Nos referimos a Brasil, Argentina, Ecuador, Venezuela, Bolivia, Uruguay. [↑](#endnote-ref-3)
3. El contenido de este apartado proviene de: Anigstein (2017),informe que resume los resultados de la investigación realizada para el proyecto: “Trade Unions in transformation. Change and win”. Caso de estudio: La Confederación Sindical de las Américas (CSA-TUCA). Global Trade Union Programme, Division for International Cooperation of Friedrich-Ebert-Stiftung, 2016-1017y en Anigstein (2016). [↑](#endnote-ref-4)
4. CSI es actualmente la mayor organización sindical del mundo. Reúne a 170 millones de trabajadores/as, 304 organizaciones afiliadas, de 161 países, según informes de prensa del 3er Congreso  Mundial ITUC, realizado en Berlín en mayo de 2014,  [http://www.ITUC-ITUC.org/3nd-ituc-world-congress?lang=es](http://www.ituc-csi.org/3nd-ituc-world-congress?lang=es) [30/06/2016]. [↑](#endnote-ref-5)
5. Así se definen un conjunto de propuestas de cambio interno en el sindicalismo. Sus ejes son la unidad, democratización y desburocratización de las organizaciones, mayor representación y participación de las mujeres trabajadoras, la juventud, los colectivos laborales vinculados a nuevas ocupaciones o el trabajo informal, tradicionalmente no integrados en los sindicatos. [↑](#endnote-ref-6)
6. Para una introducción al análisis del surgimiento, atributos, y críticas a la concepción de la Economía Verde ver Herrán, Claudia (2012) “El camino hacia una economía verde”, http://www.flacsoandes.edu.ec/web/imagesFTP/1340319587.documento_fes_09156.pdf [↑](#endnote-ref-7)
7. Para O Connor (2001) en la primera contradicción del capital la explotación del trabajo ocupa un lugar de privilegio para comprender el movimiento de destrucción y reorganización en la dinámica de acumulación. La segunda contradicción supone la primera pero la excede y condiciona al mismo tiempo. Coloca el acento en las relaciones de producción, las fuerzas productivas y las condiciones de reproducción. El problema reside en la apropiación y el uso autodestructivo por parte del capital de la fuerza de trabajo, la infraestructura, el espacio urbano y el ecosistema. [↑](#endnote-ref-8)
8. Este principio fue incluido en la Declaración de Río sobre el Medio Ambiente y el Desarrollo (ONU, 1992) y en términos generales advierte que si bien el cuidado del medio ambiente requiere responsabilidades globales, son los países desarrollados los que deben invertir un mayor esfuerzo debido a su contribución a la problemática ambiental y a sus mejores posibilidades económicas para financiar un cambio en la matriz productiva (Herrán, C., 2012) [↑](#endnote-ref-9)
9. Ver artículo OIT, 13 de abril de 2016, en https://www.ilo.org/global/topics/green-jobs/news/WCMS_325253/lang--es/index.htm [↑](#endnote-ref-10)
10. Tomado de sitio oficial de CSI, <http://www.ituc-csi.org/about-us.html?lang=es> [20/02/2017]. CSI difunde experiencias nacionales donde los sindicatos se han involucrado en procesos de transición: plataforma para el diálogo tripartito sobre el cambio climático entre sindicatos, gobierno y empresarios españoles, la ley de Energía limpia y seguridad de 2009 en Estados Unidos contiene un capítulo dedicado a los “empleos verdes y la transición de los trabajadores”. [↑](#endnote-ref-11)
11. # En el “Pabellón del Mundo del Trabajo” incluido en las actividades oficiales, la CSA realizó el Foro “Justicia Social y Climática: creando una economía para los pueblos y el medioambiente”, donde expusieron dirigentes sindicales de Brasil, Bolivia y Europa. Fuente: Informe de la delegación sindical de la CSA en Copenhague - día 7, 15/12/2009,[**http://csa-csi.org/NormalNews.asp?pageid=2553**](http://csa-csi.org/NormalNews.asp?pageid=2553) [11/07/2017].

    [↑](#endnote-ref-12)
12. La declaración final puede consultarse en inglés,: [http://rio20.net/en/propuestas/final-declaration-of-the-people%E2%80%99s-summit-in-rio-20/](http://rio20.net/en/propuestas/final-declaration-of-the-people’s-summit-in-rio-20/) [↑](#endnote-ref-13)
13. Fueron entrevistados por Cecilia Anigstein en Sao Paulo, en abril de 2016 (quienes asistían como invitados al III Congreso de la CSA): Diego Montón (CLOC-Vía Campesina), Martín Drago (REDES Amigos de la Tierra) y Nalú Farías (Marcha Mundial de Mujeres). Sus testimonios coinciden en enfatizar la importancia que la Cumbre de los pueblos en Río+20, acercando sus posiciones y dando lugar a una confluencia tanto en sus programas como en sus actividades. La relación entre estas organizaciones se ha profundizado desde entonces. [↑](#endnote-ref-14)
14. Uno de los aspectos incorporados luego de debates y discusiones con sindicatos europeos fue el de anteponer la persecución en la región de empleos decentes antes que verdes, considerando la problemática del empleo informal, así como el de sumar la noción de adaptación (no solo de mitigación) y la de piso de protección social entre las preocupaciones de los trabajadores. [↑](#endnote-ref-15)
15. El documento de la Conferencia de 2009 puede leerse <http://www.incasur.org/noticias/documentos/doc534_1.pdf> [↑](#endnote-ref-16)
16. Cecilia Anigstein, una de las autoras de este artículo, acompaño este proceso entre 2013 y 2014 como asesora convocada por la CSA, La PLADA ha sido traducida en cuatro idiomas. Su versión en inglés puede consultarse: <http://csa-csi.org/Include/ElectosFileStreaming.asp?FileId=126> [↑](#endnote-ref-17)
17. Conferencia de Rafael Freire realizada en el marco del III Congreso de la CSA, en San Pablo en abril de 2016. Testimonio recabado por las autoras. [↑](#endnote-ref-18)
18. Las autoras asistieron al encuentro en Montevideo, donde recabaron información y tomaron registros audiovisuales que enriquecen una investigación aún en proceso.

    Cuadro I: Antecedentes de acciones significativas del movimiento ambiental en el plano global (2000-2010)

    **EVENTOACCIONES Y REFERENCIAS PARA CONSULTAR**2000, COP 6, HolandaUn grupo de 500 activistas realizaron una cumbre sobre justicia climática paralela a la COP 2002, COP 8, Bali, Indonesia

    Se aprueban los principios de la justicia climática; incluyen: el principio de responsabilidades comunes pero diferenciadas, deuda ecológica, comercio de carbono o el secuestro de carbono, derecho a la autodeterminación de Pueblos Indígenas.

    Climate Lab. Climate Justice Movements: <http://climatelab.org/Climate_Justice_Movements>

    En anexos “Principios de Bali sobre Justicia Climática”: <http://www.wrm.org.uy/actores/WSSD/Bali.html>2004, COP 10, Durban, Sudáfrica"Llamado a los pueblos para actuar contra el cambio climático" y "Declaración de Durban sobre el Comercio de Carbono": [http://www.wrm.org.uy/actores/CCC/justicia.html#llamado](http://www.wrm.org.uy/actores/CCC/justicia.html" \l "llamado)2007, COP 13, Bali IndonesiaSe conformó una coalición que se autodenominó “¡Justicia climática ya!” y la Red Climate Justicie Now!

    Climate Justice Now! Statement: <http://www.carbontradewatch.org/index.php?option=com_content&task=view&id=227&Itemid=95>2009

    COP 15, Copenhaugue

    Fracaso de las negociaciones oficiales

    Tribunal Internacional de Justicia Climática (Bolivia)

    Foro Social Mundial de BelémImportante movilización, se convoca Klimaforum y en Reclaim Power

    El 13 y 14 de octubre de 2009, tuvo lugar en Cochabamba (Bolivia), la Primera Audiencia del Tribunal Internacional de Justicia Climática (TIJC), que fue promovido por organizaciones indígenas y activistas por el medio ambiente de Latinoamérica. El objetivo principal del Tribunal era: “Visibilizar las causas del cambio climático y juzgar a los principales estados y empresas responsables del calentamiento global por sus efectos sobre los derechos humanos, los derechos de los pueblos y los derechos de la naturaleza, en ese marco denunciar los impactos de medidas de mitigación y captación como los

    En 2009, en el Foro Social Mundial de Belém, se realizo la declaración “Justicia Climática Ahora!, 2010

    Cumbre de la Madre Tierra (Bolivia)Cumbre Mundial de los Pueblos sobre el cambio climático y los derechos de la Madre Tierra que reunió a más de 30 mil activistas de todo el mundo. Fue impulsada por Evo Morales, luego del fracaso de Copenhague.

    **Fuente**: elaboración propia en base información de diversos medios de prensa, declaraciones y documentos publicados por organizaciones involucradas.

    Cuadro II: Participación sindical -CSI y CSA- en las COPs (2008-2015)

    **CMNUCCDEMANDAS DE CSI / CSA*CONTRA CUMBRESHECHOS SIGNIFICATIVOS**COP 14

    Poznan, 2008

    (100 delegados sindicales)Transición justa

    Economía verde

    Empleos verdes y decentes

    “Nuevo Acuerdo Verde” (diálogo social formal)Los sindicatos son reconocidos como grupo oficial en la CMNUCCCOP 15

    Copenhague, 2009

    (400 delegados sindicales)

    Fondo Mundial para la protección social de los países más pobres

    Transición socialmente justa

    Empleo verde y decente

    La CSA introduce el concepto de justicia climática en actividades durante la cumbreEnero/febrero: Foro Social Mundial Belem Do Pará: ¡No a la economía casino! (participa la CSI)

    Klimafórum: Movilización de 100 mil personas (fuerte participación de sindicatos belgas y las organizaciones internacionales), represión y detenidosLas organizaciones de la sociedad civil son excluidas del centro de Conferencias de la ONU

    La transición justa es mencionada por primera vez en el documento oficialCOP 16

    Cancún, 2010

    (200 delegados sindicales)Crítica al mercado de carbono y Fondo para el clima (100 mil millones de dólares).

    Se oponen a que el financiamiento sea privado y proponen la creación de un impuesto a las transacciones financieras, administrado por ONU, y no por el Banco MundialCampaña Transición justa Ya!

    Los movimientos ambientales demandan justicia climática. No hay registros de participación de sindicatos en contra cumbres

    Cumbre en Cochabamba (Bolivia) por la madre tierra. No participa la CSI ni la CSA

    2do Congreso de CSI: Resolución combatir el cambio climático mediante el desarrollo sostenible y una transición justa

    Se incorpora una referencia a la transición justa en el texto final de la COPCOP 17

    Durban, 2011

    (300 delegados sindicales)Tasa sobre las transacciones financieras para financiar la acción contra el cambio climático

    Piso de protección social universal

    Empleo verde y decente

    Transición justaEn abril Foro “Dialogo de Madrid” , la CSI articula con Oxfam, Friends of the Earth, Greenpeace, el Consejo Global de Energía Eólica, y agencias de la ONU, la OIT y PNUMA.

    En Durban Los movimientos ambientales reclaman justicia climática. No hay registro de participación de sindicatos en contra cumbresLa CSI denuncia que la crisis internacional y las deudas de los países son una excusa para las políticas de austeridad

    En las negociaciones se incorpora la propuesta del Fondo Verde para el clima, pero no hay referencias sobre cuál será la fuente de financiamientoRío + 20

    2012

    (700 delegados sindicales)Conclusiones de la II Asamblea Sindical Sobre Trabajo y Medioambiente:

    Transición Justa

    Impuesto sobre las Transacciones Financieras a nivel global y regional, para financiar la lucha contra el cambio climático y el desarrollo.

    Contra la privatización y mercantilización de los bienes comunes, los recursos naturales y sectores estratégicos (energía y transporte)

    Reforma agraria y producción sustentable de alimentos. Las políticas públicas deben preservar los bienes comunes y los recursos naturalesCumbre de los pueblos

    Importante movilización, con fuerte presencia de centrales sindicales brasileras.

    Se realiza una importante asamblea sindical por el clima, ver doc.

    La CSA participa de la organización de la contracumbre en alianza con movimientos sociales de AL.

    Documento final: <http://rio20.net/propuestas/declaracion-final-de-la-cumbre-de-los-pueblos-en-la-rio20/>

    Las entrevistas referencian la importancia de Río + 20 en el inicio de una etapa de articulación entre CSA, CLOC-Vía Campesina, Marcha Mundial de mujeres, Amigos de la tierra AL, Jubileo Sur, luego de algunos años de enfriamiento de las acciones regionales que tuvo lugar con el fin del proceso de la ASC contra el ALCACOP 18

    Qatar, 2012Empleos verdes y decentes

    Piso de protección social

    Reforma del sistema financieroNo hay registro de actividades paralelas o Contracumbre. Puede deberse a la realidad de Qatar, y la dificultad para realizar actividades en la vía públicaEn su 2do Congreso la CSA define sus prioridades en la agenda medioambiental, donde puede observarse cierta autonomía respecto de CSI:

    Resolución 12: sobre la conferencia de ONU en Río +20

    Resolución 19: sobre reforma agraria, instrumento del desarrollo con justicia social y ambientalCOP 19

    Varsovia, 2013Ver doc. De las organizaciones que abandonan las negociaciones, al que suscriben los sindicatosLa sociedad civil denuncia “Cumbre del carbón” y habla de la farsa de Varsovia. Las organizaciones de la sociedad civil (incluidos sindicatos) abandonan la COP COP 20

    Lima, 2014Justicia climática (CSI)

    La CSA suscribe al documento final de la cumbre de los pueblos , que refleja principalmente las demandas de los movimientos sociales de AL

    Ver doc. Cumbre de los pueblos: más de 2000 personas en la Conferencia Mundial de los Pueblos sobre Cambio Climático. Llamamiento a la creación de un Tribunal internacional de Justicia climática.

    Movimientos sociales de AL organizan la contracumbre

    Movilización: cambiemos el sistema, no el clima

    Fuerte presencia de movimiento indígena y campesino, y de la CGT Perú

    3er Congreso de CSI: resolución sobre empleos sostenibles, ingresos seguros y protección social: Justicia climática.

    PLADA: eje ambiental

    En la COP 20 por primera vez las propuestas sobre justicia climática logran impregnar las conferencias de la COP, y se incluyen por primera vez en el debate gubernamental el tema de la justicia climática y la discusión sobre derechos humanos y cambio climático.

    COP 21

    París, 2015Transición justa

    Justicia climáticaCoalition climat 21, 130 organizaciones, sindicales y sociales, tributario de las grandes movilizaciones de 2014: septiembre Nueva York, la marcha de los pueblos por el clima, y en diciembre en Lima, la Cumbre de los pueblos frente al cambio climático.

    La OIT adopta y define el principio de transición justa

    2016: 3er Congreso de CSA, la temática ambiental se incorpora transversalmente en varias resoluciones, siempre asociadas a la noción de desarrollo, sobresale la 1. Desarrollo sustentable (retoma pilar ambiental de plada), la 5. Alianzas sociales (orientadas a la construcción de un desarrollo alternativo contra-hegemónico) y la 17. Reforma agraria.

    En el preámbulo del acuerdo de París, se introduce por primera vez en las negociaciones el concepto de Justicia climática, aunque solo de un modo efímero.

    *****Las demandas de la CSI deben ser asumidas y promovidas por la CSA dado el vínculo orgánico existente (la CSA es filial de la CSI). La CSA puede influir con sus representantes en la definición de las políticas de la CSI. Asimismo, tiene margen para hacer acciones alternativas que no contradigan los compromisos asumidos en la CSA. En este último caso, lo señalamos. Cuando los eventos se realizan en el continente americano, es observable la presencia de los representantes de a CSA y su influencia en la definición de las acciones y demandas.

    **Fuente**: elaboración propia en base a documentos internos de CSI y CSA, partes de prensa de CSI y CSA, notas periodistas de diversos medios. [↑](#endnote-ref-19)
